# Supplementary material
Source: Elsevier journal article supplement (https://www.sciencedirect.com/science/article/pii/S0014256519301651)
Supplement: mmc1 [file S0014256519301651:mmc1.pdf]

## MATERIAL SUPLEMENTARIO

En la tabla 1 se reflejan los resultados del cruce de los distintos documentos al estudiar si los comentarios adicionales fueron salvados con rúbrica o no.

Tabla 1 - resultados del cruce de los distintos documentos al estudiar si los comentarios adicionales fueron salvados con rúbrica o no.

|                      |                     |                                     | Observaciones sin firma |       |                         |                    | Total  |
|----------------------|---------------------|-------------------------------------|-------------------------|-------|-------------------------|--------------------|--------|
|                      |                     |                                     | Si                      | No    | Firmada por otro médico | No puede valorarse |        |
| Documento que emplea | OMC antiguo         | Recuento                            | 1                       | 67    | 1                       | 0                  | 69     |
|                      |                     | % dentro de V1 Documento que emplea | 1,4%                    | 97,1% | 1,4%                    | 0,0%               | 100,0% |
|                      |                     | Residuo corregido                   | -7,0                    | 7,0   | ,5                      | -,9                |        |
|                      | OMC nuevo           | Recuento                            | 43                      | 89    | 1                       | 2                  | 135    |
|                      |                     | % dentro de Documento que emplea    | 31,9%                   | 65,9% | ,7%                     | 1,5%               | 100,0% |
|                      |                     | Residuo corregido                   | -1,7                    | 1,6   | -,4                     | ,8                 |        |
|                      | Propio del Hospital | Recuento                            | 71                      | 33    | 1                       | 1                  | 106    |
|                      |                     | % dentro de Documento que emplea    | 67,0%                   | 31,1% | ,9%                     | ,9%                | 100,0% |
|                      |                     | Residuo corregido                   | 7,9                     | -7,8  | ,0                      | ,0                 |        |
|                      | Total               | Recuento                            | 115                     | 189   | 3                       | 3                  | 310    |
|                      |                     | % dentro de Documento que emplea    | 37,1%                   | 61,0% | 1,0%                    | 1,0%               | 100,0% |

En la tabla 2 se recogen cómo se indica la dirección del fallecimiento en el documento actual de la OMC:

Tabla 2 - cómo se indica la dirección del fallecimiento en el documento actual de la OMC.

|                        |                             |                                    | Se especifica el sitio (nuevo CMD) |                                               |                                      |                                           | Total  |
|------------------------|-----------------------------|------------------------------------|------------------------------------|-----------------------------------------------|--------------------------------------|-------------------------------------------|--------|
|                        |                             |                                    | Se especifica el nombre del centro | Se especifica el nombre del centro y la calle | Pone el nombre de la calle solamente | No se especifica el sitio ni la dirección |        |
| Lugar de fallecimiento | Domicilio                   | Recuento                           | 0                                  | 0                                             | 22                                   | 4                                         | 26     |
|                        |                             | % dentro de Lugar de fallecimiento | 0,0%                               | 0,0%                                          | 84,6%                                | 15,4%                                     | 100,0% |
|                        |                             | Residuo corregido                  | -9,0                               | -2,0                                          | 12,9                                 | 3,9                                       |        |
|                        | Centro hospitalario público | Recuento                           | 125                                | 3                                             | 0                                    | 0                                         | 128    |
|                        |                             | % dentro de Lugar de fallecimiento | 97,7%                              | 2,3%                                          | 0,0%                                 | 0,0%                                      | 100,0% |
|                        |                             | Residuo corregido                  | 8,6                                | -4,9                                          | -5,5                                 | -2,8                                      |        |
|                        | Total                       | Recuento                           | 59                                 | 15                                            | 1                                    | 0                                         | 75     |

|                                       |                                    |       |       |       |       |        |
|---------------------------------------|------------------------------------|-------|-------|-------|-------|--------|
| Centro hospitalario privado           | % dentro de Lugar de fallecimiento | 78,7% | 20,0% | 1,3%  | 0,0%  | 100,0% |
|                                       | Residuo corregido                  | 1,2   | 2,3   | -3,1  | -1,8  |        |
| Residencia sanitaria                  | Recuento                           | 9     | 15    | 3     | 0     | 27     |
|                                       | % dentro de Lugar de fallecimiento | 33,3% | 55,6% | 11,1% | 0,0%  | 100,0% |
|                                       | Residuo corregido                  | -5,0  | 7,1   | ,1    | -1,0  |        |
| Centro hospitalario (sin especificar) | Recuento                           | 0     | 0     | 2     | 4     | 6      |
|                                       | % dentro de Lugar de fallecimiento | 0,0%  | 0,0%  | 33,3% | 66,7% | 100,0% |
|                                       | Residuo corregido                  | -4,1  | -,9   | 1,8   | 9,2   |        |
| Total                                 | Recuento                           | 193   | 33    | 28    | 8     | 262    |
|                                       | % dentro de Lugar de fallecimiento | 73,7% | 12,6% | 10,7% | 3,1%  | 100,0% |

Por último, en la tabla 3 se puede apreciar si las observaciones adicionales se salvaron más o menos veces con firma teniendo en cuenta el lugar de fallecimiento en los actuales CMD.

Tabla 3 - las observaciones adicionales se salvaron con firma teniendo al cruzarlo con el lugar de fallecimiento en los actuales CMD.

|                        |                                       |                                    | Observaciones sin firma |       |                         |                    | Total  |
|------------------------|---------------------------------------|------------------------------------|-------------------------|-------|-------------------------|--------------------|--------|
|                        |                                       |                                    | Si                      | No    | Firmada por otro médico | No puede valorarse |        |
| Lugar de fallecimiento | Domicilio                             | Recuento                           | 8                       | 43    | 1                       | 0                  | 52     |
|                        |                                       | % dentro de Lugar de fallecimiento | 15,4%                   | 82,7% | 1,9%                    | 0,0%               | 100,0% |
|                        |                                       | Residuo corregido                  | -3,6                    | 3,5   | ,8                      | -,8                |        |
|                        | Centro hospitalario público           | Recuento                           | 90                      | 97    | 2                       | 3                  | 192    |
|                        |                                       | % dentro de Lugar de fallecimiento | 46,9%                   | 50,5% | 1,0%                    | 1,6%               | 100,0% |
|                        |                                       | Residuo corregido                  | 4,5                     | -4,8  | ,2                      | 1,4                |        |
|                        | Centro hospitalario privado           | Recuento                           | 12                      | 32    | 0                       | 0                  | 44     |
|                        |                                       | % dentro de Lugar de fallecimiento | 27,3%                   | 72,7% | 0,0%                    | 0,0%               | 100,0% |
|                        |                                       | Residuo corregido                  | -1,5                    | 1,7   | -,7                     | -,7                |        |
|                        | Residencia sanitaria                  | Recuento                           | 2                       | 15    | 0                       | 0                  | 17     |
|                        |                                       | % dentro de Lugar de fallecimiento | 11,8%                   | 88,2% | 0,0%                    | 0,0%               | 100,0% |
|                        |                                       | Residuo corregido                  | -2,2                    | 2,4   | -,4                     | -,4                |        |
|                        | Centro hospitalario (sin especificar) | Recuento                           | 3                       | 2     | 0                       | 0                  | 5      |
|                        |                                       | % dentro de Lugar de fallecimiento | 60,0%                   | 40,0% | 0,0%                    | 0,0%               | 100,0% |
|                        |                                       | Residuo corregido                  | 1,1                     | -1,0  | -,2                     | -,2                |        |
| Total                  | Recuento                              | 115                                | 189                     | 3     | 3                       | 310                |        |

|                                       |       |       |      |      |        |
|---------------------------------------|-------|-------|------|------|--------|
| % dentro de Lugar<br>de fallecimiento | 37,1% | 61,0% | 1,0% | 1,0% | 100,0% |
|---------------------------------------|-------|-------|------|------|--------|
